# Supplementary material
Source: Springer Nature journal article supplement (https://www.springermedizin.de/resource/supplementary/12889_2011_3891_MOESM1_ESM.pdf/9490806)

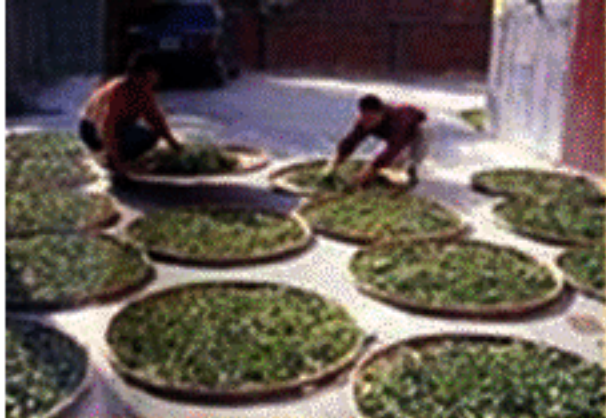

1. Solar Withering

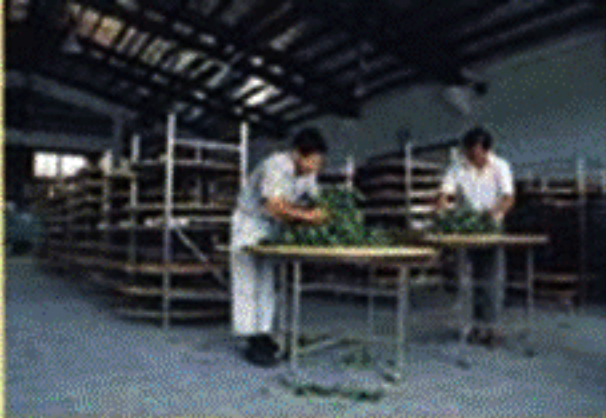

2. Indoor Withering & Stirring

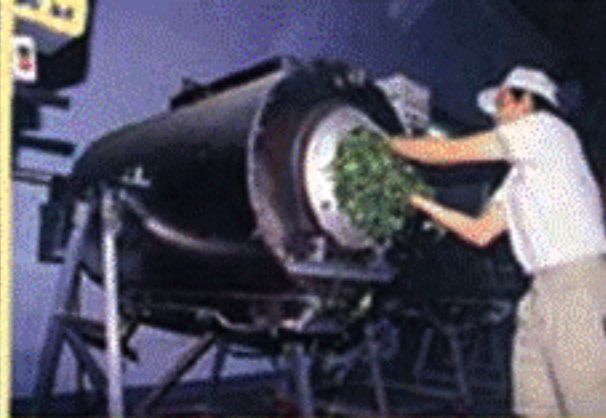

3. Panning

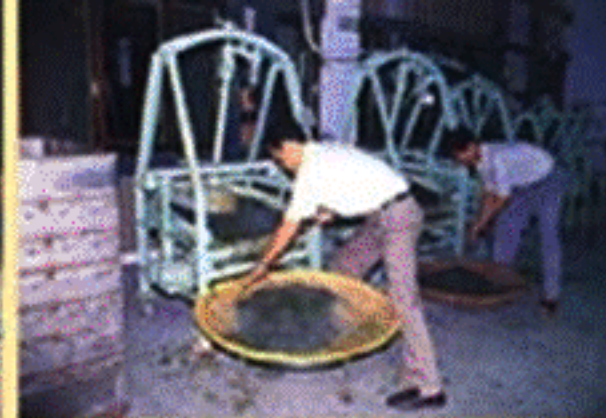

4. Rolling

7. Made Tea

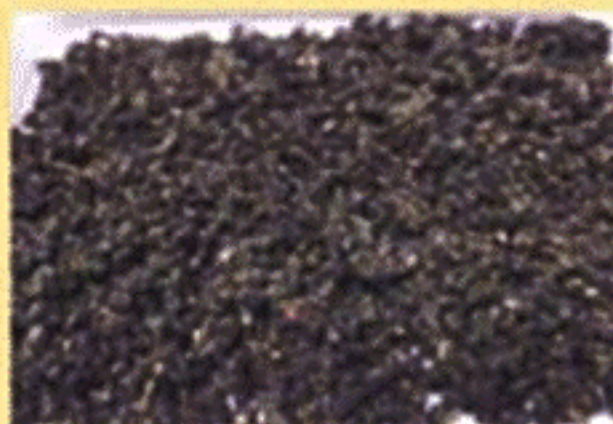

6. Primary Drying

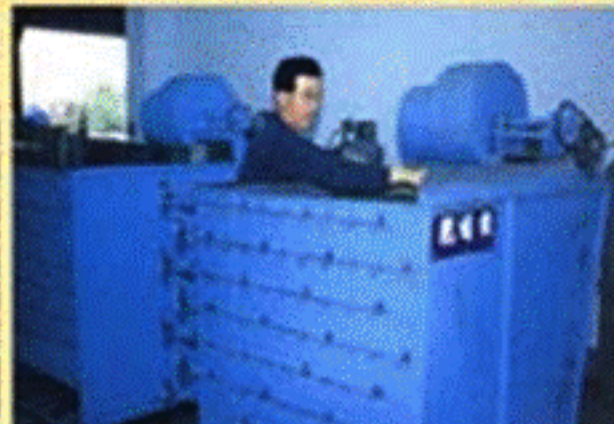

5. Ball Rolling

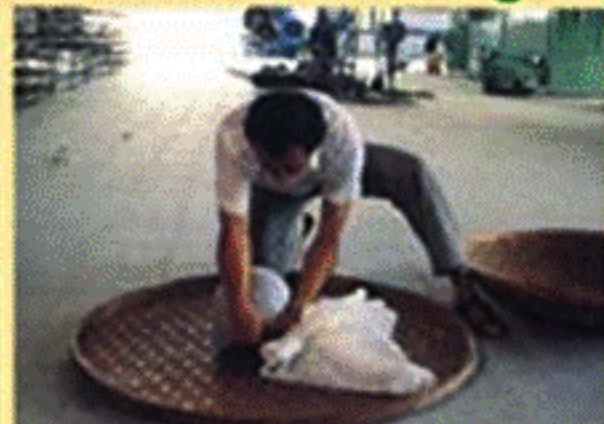

Supplement: MOESM1 [file 9490806]
